# Supplementary material for: Alternative polyadenylation confers Pten mRNAs stability and resistance to microRNAs
Source: PubMed Central journal article supplement — Nucleic Acids Res. 2018 Jul 24;46(19):10340–52. doi: 10.1093/nar/gky666 (PMC6212768; doi:10.1093/nar/gky666), 2018-07-24
Supplement: gky666_supplemental_files.pdf [file gky666_supplemental_files.pdf]

## **Supplementary material**

### ***Pten* mRNA alternative 3'-UTRs confer stability and resistance to microRNAs**

Caroline Thivierge, Hsin Wei Tseng, Vinay K. Mayya, Carine Lussier, Simon-Pierre Gravel and Thomas F. Duchaine

#### **Inventory of supplementary data**

##### **Supplementary Tables (7)**

- **Supplementary Table S1 relates to Figure 1**
- **Supplementary Table S2 relates to Figure 1**
- **Supplementary Table S3 relates to Figure 1**
- **Supplementary Table S4 relates to Figure 1**
- **Supplementary Table S5 relates to Figure 1**
- **Supplementary Table S6 relates to Figure 4,5 and 6**
- **Supplementary Table S7 relates to Figure 5 and 6**
- **Supplementary Table S8 relates to Figure 3**

##### **Supplementary Figures and legends (7)**

- **Supplementary Figure S1 relates to Figure 3**
- **Supplementary Figure S2 relates to Figure 3**
- **Supplementary Figure S3 relates to Figure 4, 5 and 6**
- **Supplementary Figure S4 relates to Figure 4, 5 and 6**
- **Supplementary Figure S5 relates to Figure 4**
- **Supplementary Figure S6 relates to Figure 4**
- **Supplementary Figure S7 relates to Discussion**

## Supplementary Figure S1:

### Luciferase assays in prostate cells (CaP2)

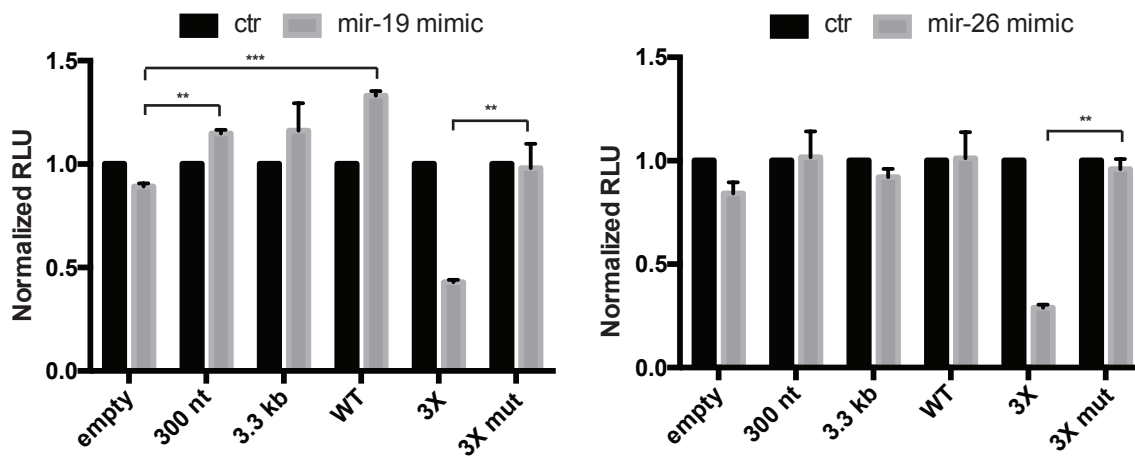

Supplementary Figure S2

miRNA overexpression in NMuMG cells

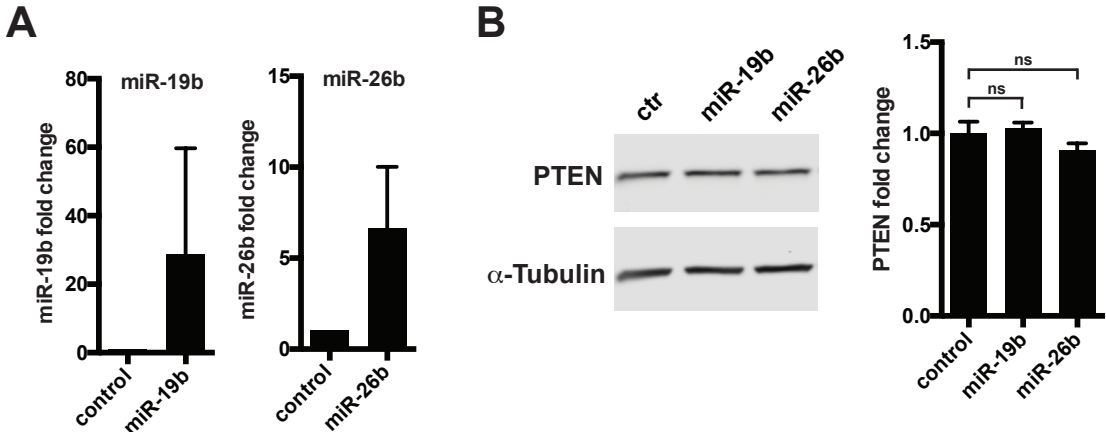

**Supplementary Figure S3:  
3'UTR isoform specific qPCR strategy (300 nt 3'UTR isoform)**

**A**

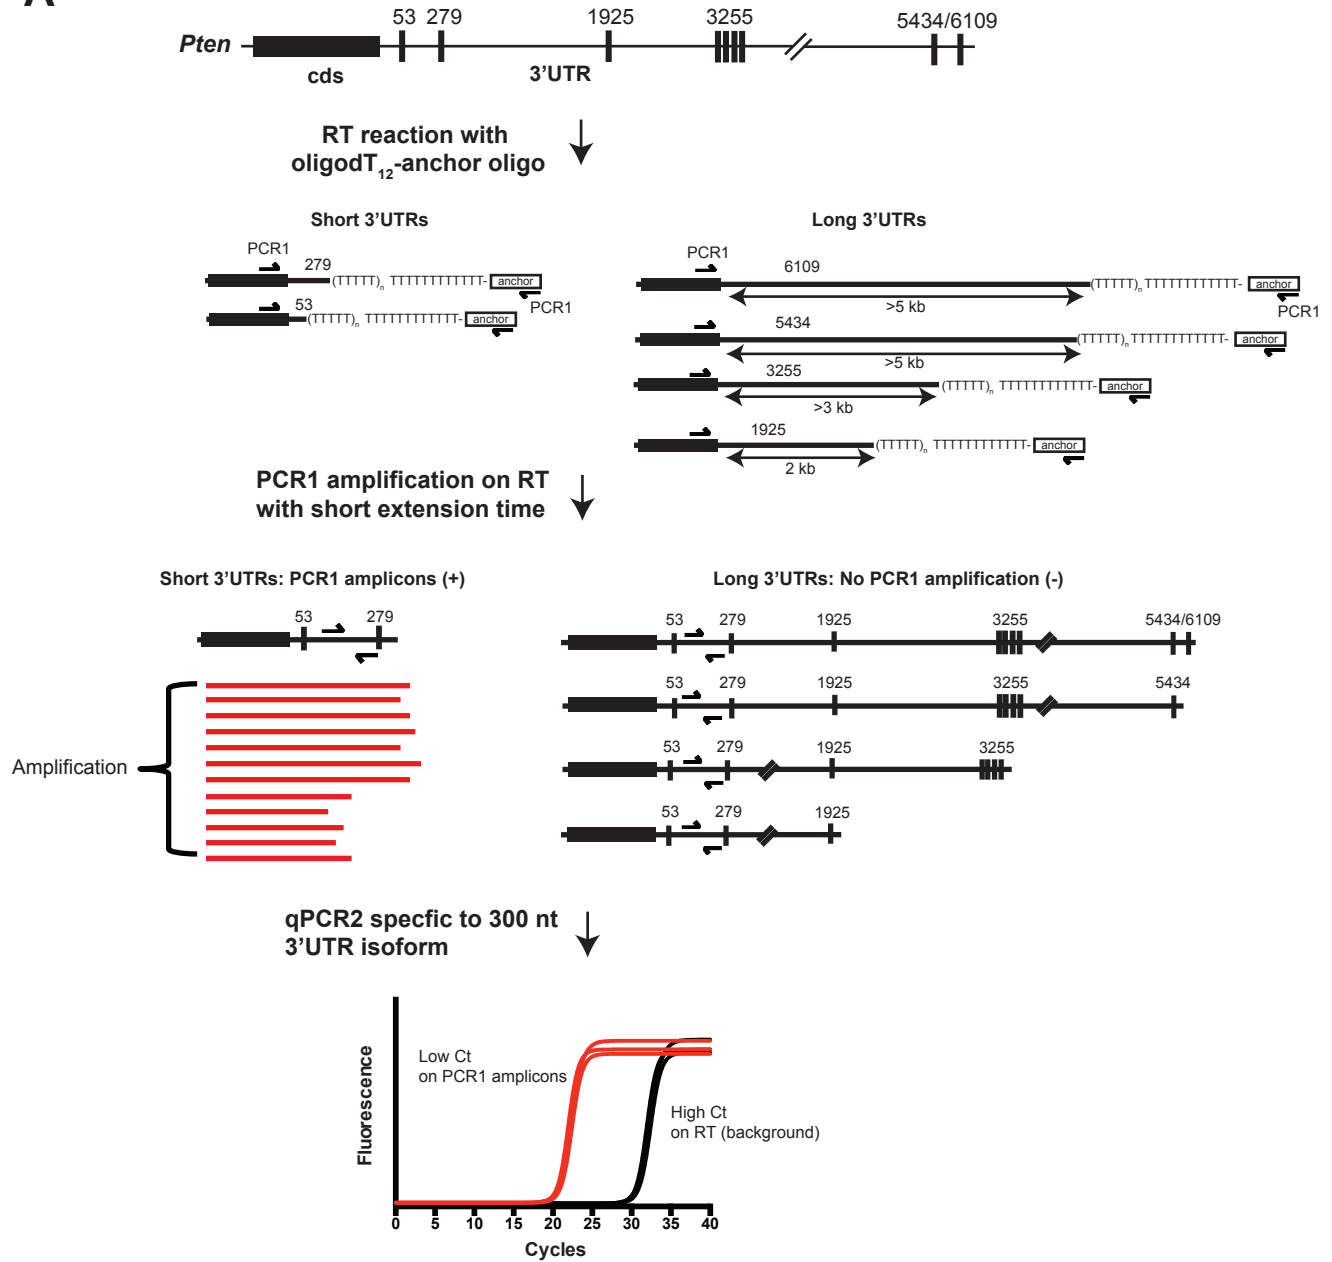

**B**

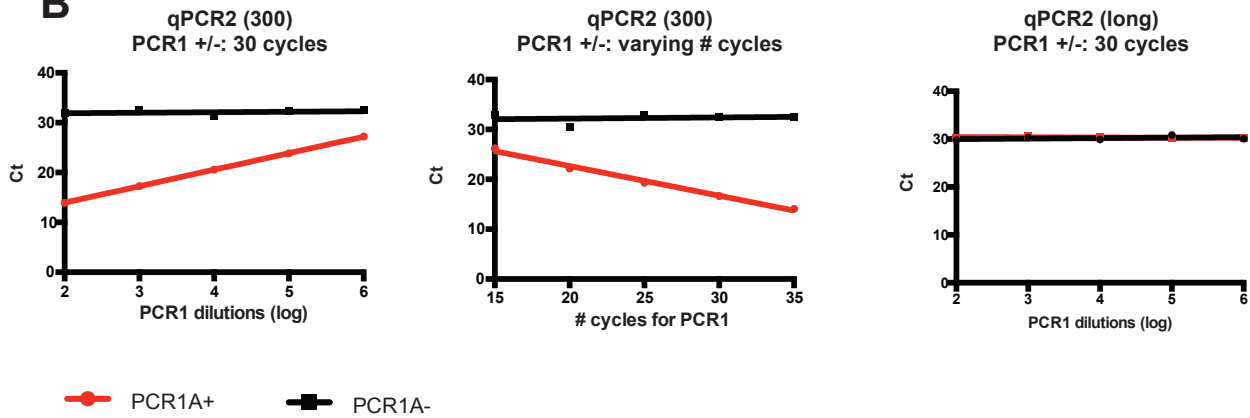

# Supplementary Figure S4: 3'UTR isoform specific qPCR strategy (3.3 kb 3'UTR isoform)

**A**

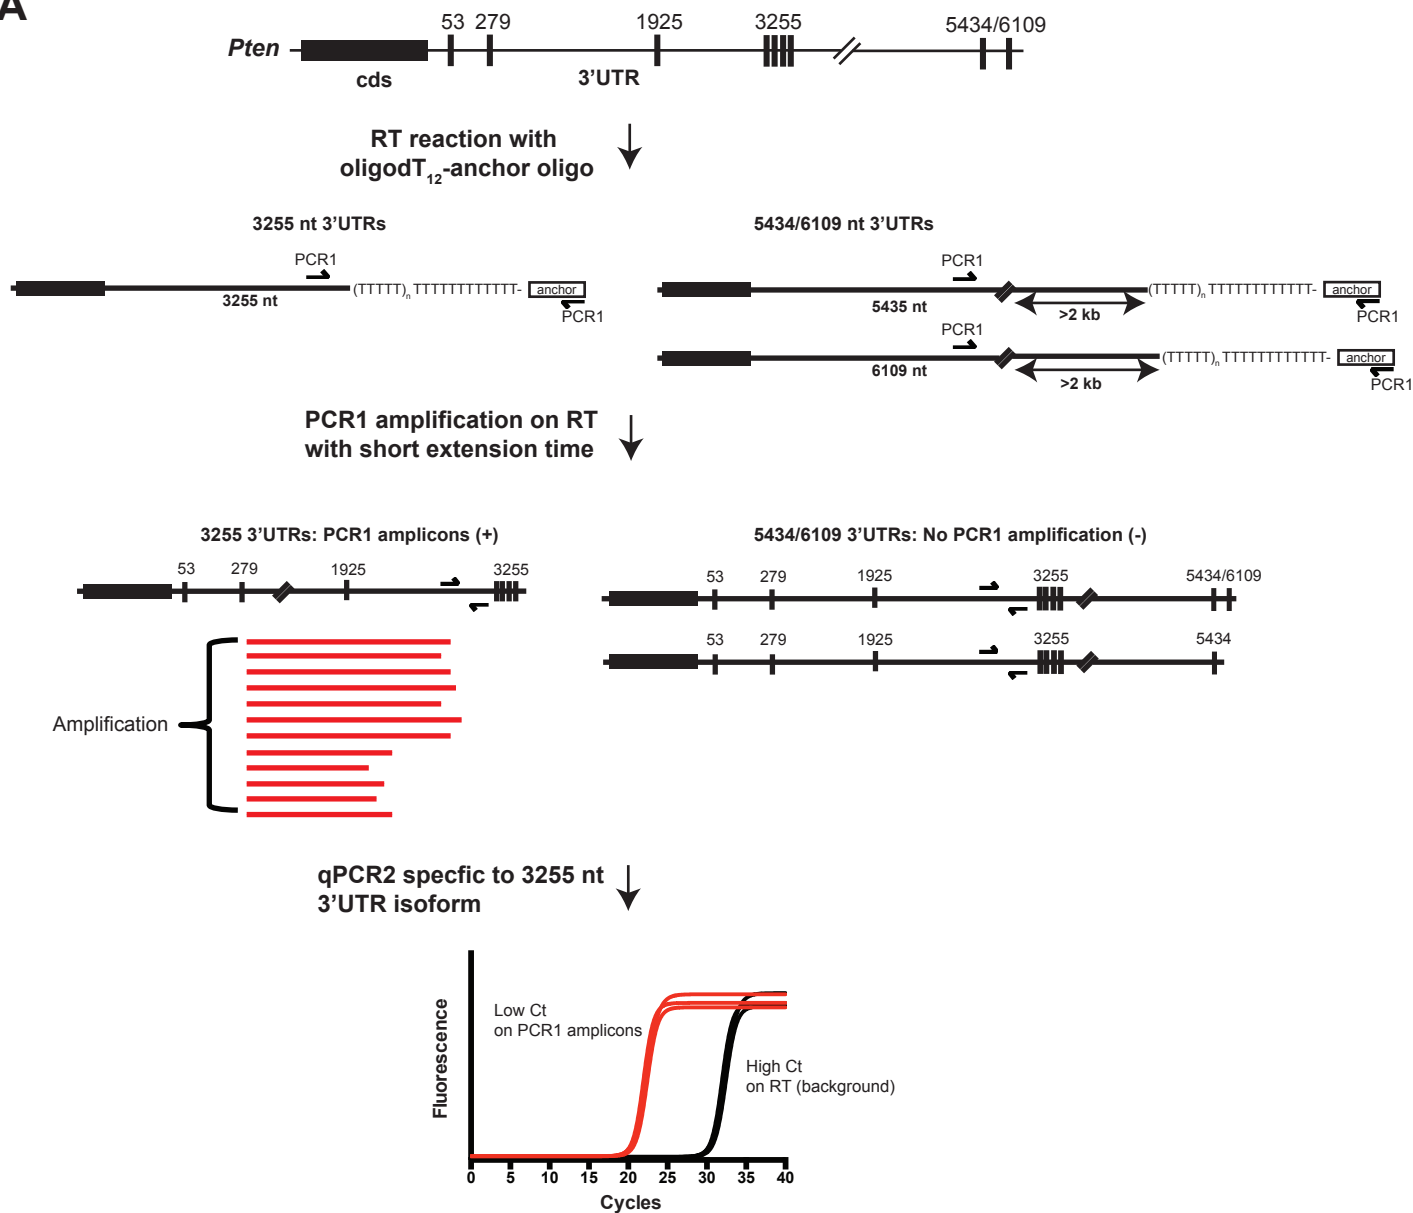

**B**

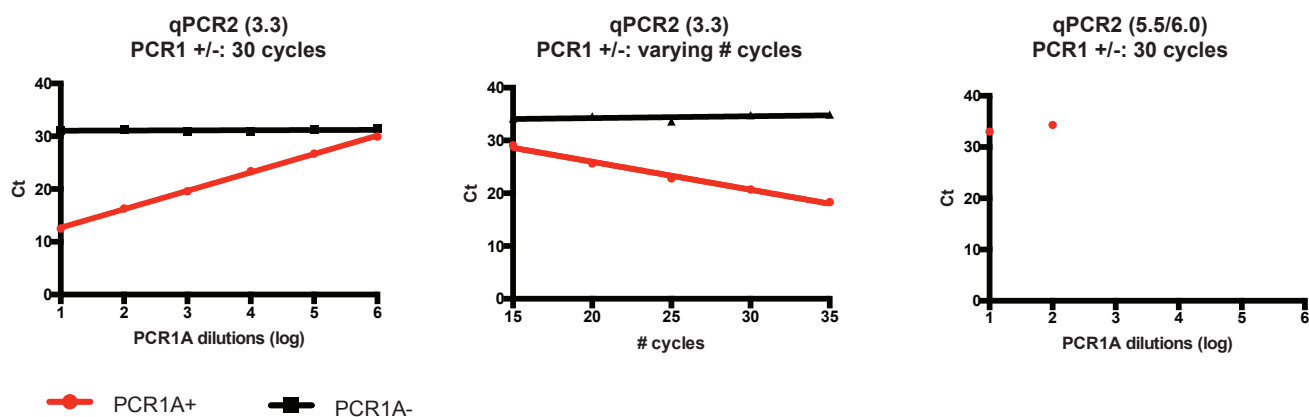

**Supplementary Figure S5:  
mRNA stability assay**

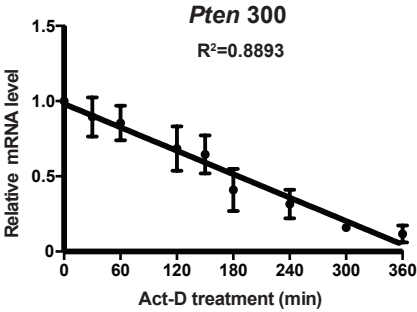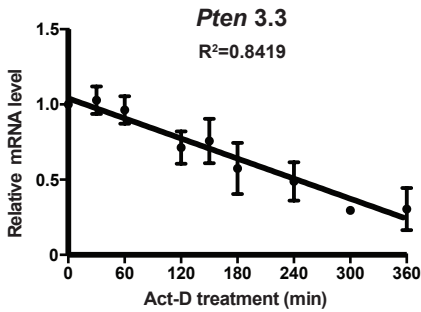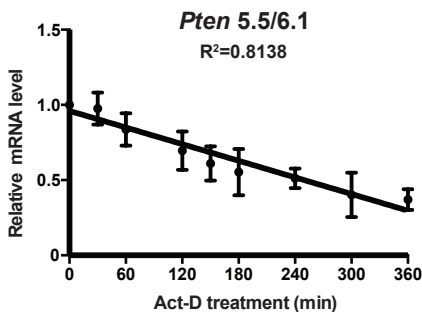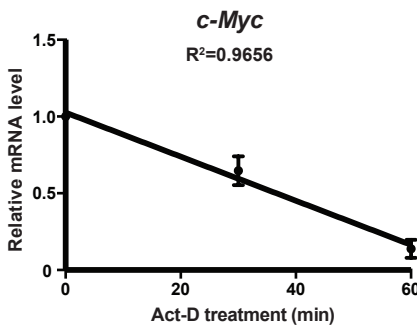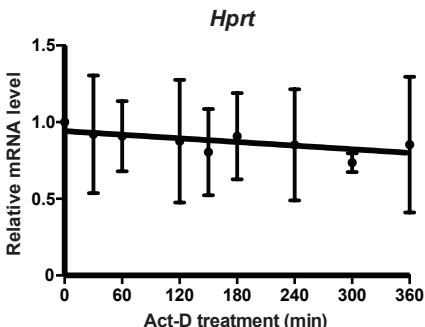

# Supplementary Figure S6

## NIH3T3 Pten mRNA isoform polysome analysis

### Pten 300 vs 3.3kb 3'UTR mRNAs

### Pten 300 vs 5.5/6.1kb

Polysome fractions  
(9-12)

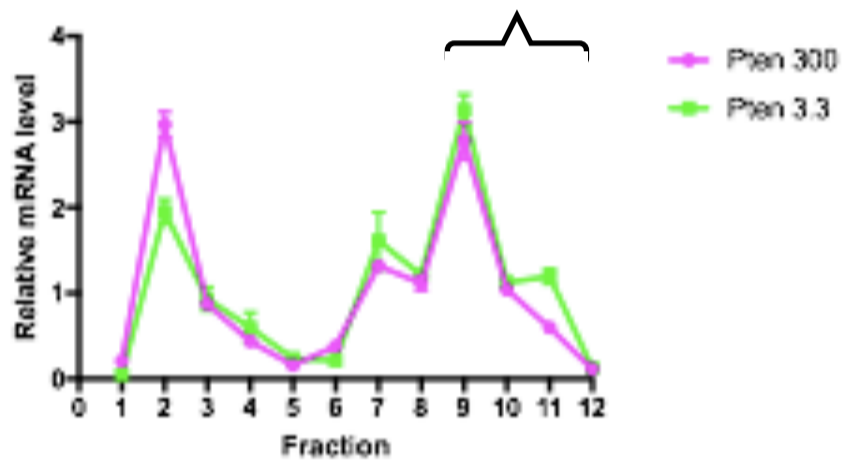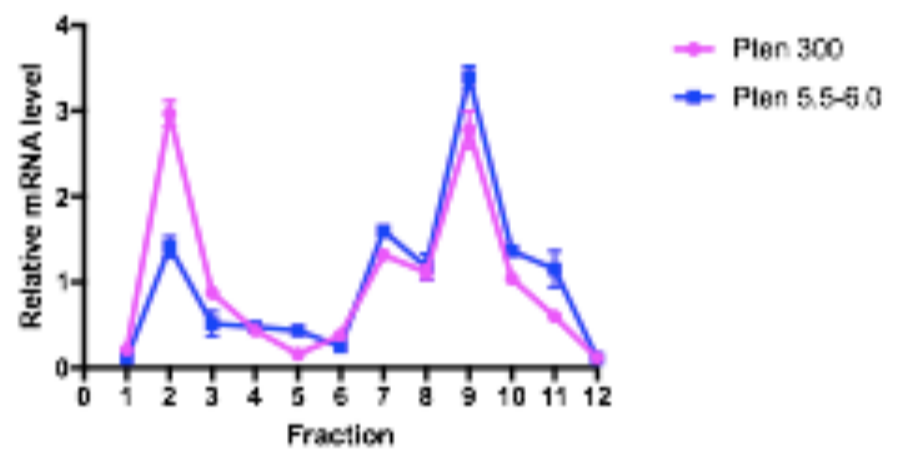

### All isoforms

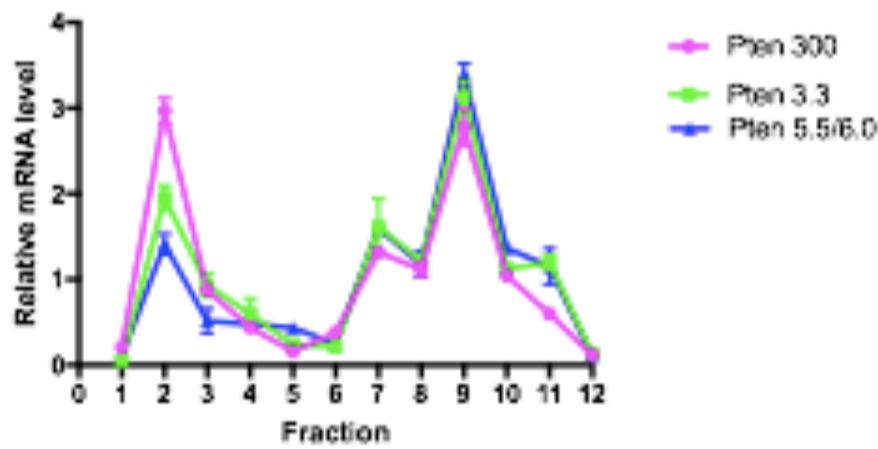

### Hprt mRNA

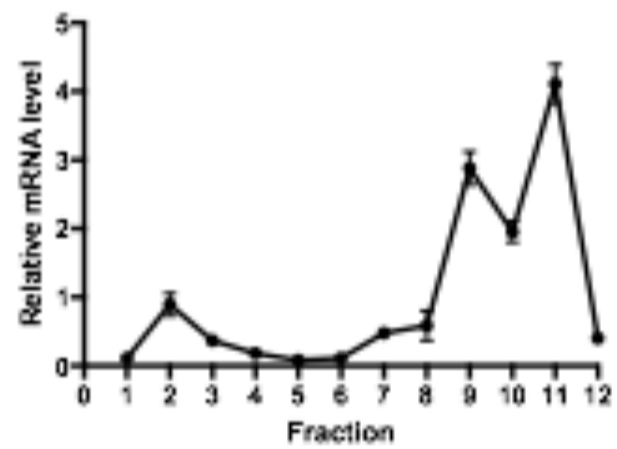

Supplementary Figure S7:

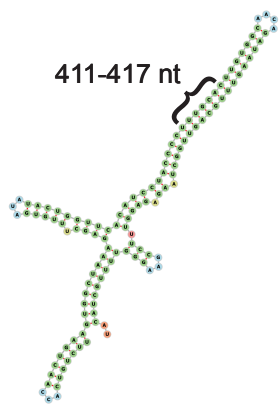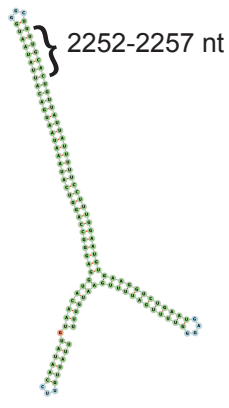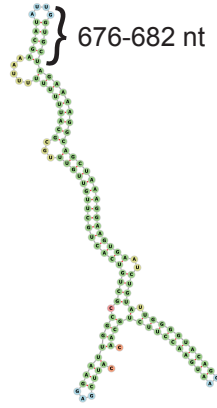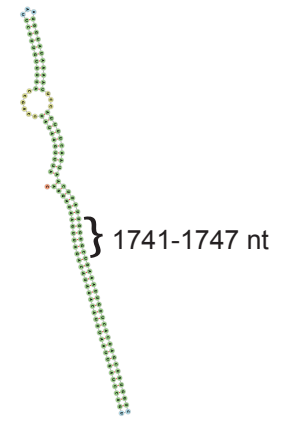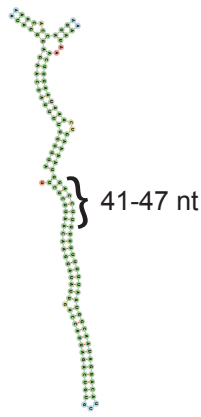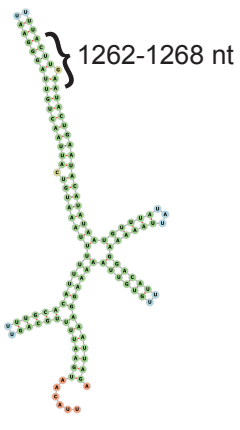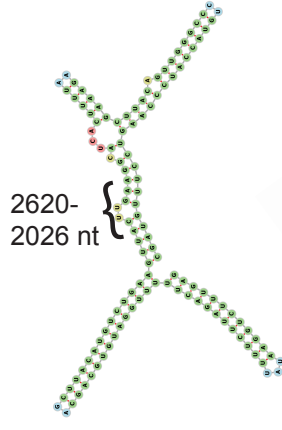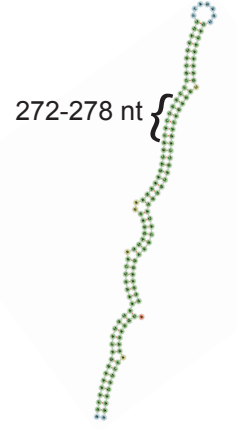



### **Supplementary Figure legends:**

#### Supplementary Figure S1

Luciferase assay in prostate CaP2 cells co-transfected with isoform specific *Pten* 3'UTR reporter constructs and miRNA mimic control, miR-19 or miR-26. Control 3X-Bulge (3X) and 3X-Bulge mutated (3X mut) miR-19 and miR-26 were used as positive controls. Data shown are from three independent biological experiments.

#### Supplementary Figure S2

(A) Quantification of mature miRNA miR-19 and miR-26 by qRT-PCR after infection of NMuMG cells with control, miR-26b or miR-19b lentivirus. (B) PTEN analysis by western blot in NMuMG stable infected cells.  $\alpha$ -Tubulin was used as a loading control. Bar graph shows PTEN fold change in miR-19 and miR-26 overexpressing cells compare to control. Data shown are from three independent biological experiments.

#### Supplementary Figure S3

(A) (i) A reverse transcriptase reaction was performed with an oligo dT-anchor primer. (ii) For PCR1 amplification, a forward primer close to the 300 nt isoform polyA tail and a reverse primer matching the anchor sequence were used. The specificity of qPCR2 for the 300 nt isoform relies on the short extension time of 20 seconds used for PCR1, which favor the amplification of the two short isoforms (53 and 273 nt) over the longer ones. (iii) A quantitative real-time PCR (qPCR2) is performed on PCR1 with primers localized in between the 53 nt and

273 nt 3'UTR isoforms, eliminating the possibility to amplify the 53 nt 3'UTR isoform. A difference of approximately 10 Cts is obtained between the qPCR2 performed on the PCR1 amplicons (PCR1+) compared to the RT background (PCR1-). (B) Linear regression analysis to confirm that PCR1 dilution and the number of cycles used are in the linear range. (C) qPCR2 amplification with primers designed to amplify 3'UTR isoforms longer than 300 nt confirm the specificity of the qPCR assay.

#### Supplementary Figure S4

(A) The same strategy was used to quantify specifically the 3.3 kb isoform with a forward oligo for PCR1 close to the polyA tail of the 3.3 kb isoform. The short extension time of PCR1 did not allowed the amplifications of longer isoforms and qPCR2 on the PCR1 amplicons (PCR1+) were 10 Ct lower than on the RT background (PCR1-). (B) Linear regression analysis to confirm that PCR1 dilution and the number of cycles used are in the linear range. (C) qPCR2 amplification with primers designed to amplify the 5.5/6.0 kb isoforms confirm the specificity of the qPCR assay.

#### Supplementary Figure S5

Linear regression analysis on NMuMG actinomycin treated cells for each *Pten* 3'UTR isoforms (*Pten* 300, *Pten* 3.3 and *Pten* 5.5/6.1), *c-Myc* positive control and the normalizing gene *Hprt*. Data shown are from four independent biological experiments.

Supplementary Figure S6.

Polysome gradient mRNA profiling was performed as in (52) on NIH3T3 cell lysates, and *Pten* mRNA isoforms were quantified by qRT-PCR as in Supplementary Figures S3, S4. Because they are expressed at different levels, the 300 nt, 3.3, and 5.5/6.1 kb 3'UTR isoforms were represented relatively to the total signal for comparison of their relative distribution. *Hprt* mRNA was quantified as a highly translatable control.

Supplementary Figure S7.

Mouse *Pten* 3' UTR structure prediction using MC-Fold. 60 nts on either side of seed-complementary sequences were used as input. Lowest minimum free energy (MFE) structures predicted by MC-fold are indicated for each site. Brackets indicate the positioning of seed-complementary sequences in *Pten* 3' UTR. Note that MC-Fold considers both canonical and non-canonical base-pairing of nucleotides.

### Supplementary Table S1:

Summary of 3'RACE sequencing data in mouse cell lines

|                                                                                                                                                                            |                                                                          |
|----------------------------------------------------------------------------------------------------------------------------------------------------------------------------|--------------------------------------------------------------------------|
| <b>PAS-1 (53 nt)</b><br><b>Primers:</b> PCR1 Tdo886, PCR2 Tdo910                                                                                                           |                                                                          |
| <b>NIH3T3:</b>                                                                                                                                                             |                                                                          |
| Clone-7:                                                                                                                                                                   | TGAATAAACTGAAATGGACCTTT(A) <sub>16</sub>                                 |
| <b>NMuMG:</b>                                                                                                                                                              |                                                                          |
| Clone-5:                                                                                                                                                                   | TGAATAAACTG(A) <sub>19</sub>                                             |
| Clone-8:                                                                                                                                                                   | TGAATAAACTGAAATGGACCTTT(A) <sub>19</sub>                                 |
| <b>PAS-2 (279 nt)</b><br><b>Primers:</b> PCR1 Tdo886, PCR2 Tdo2187                                                                                                         |                                                                          |
| <b>NIH3T3:</b>                                                                                                                                                             |                                                                          |
| Clone-2:                                                                                                                                                                   | ATAAATAAAAGATGGCACTTTCCCATT(A) <sub>59</sub>                             |
| Clone-5:                                                                                                                                                                   | ATAAATAAAAGATGGCACTTTCCCATTTTATTCCAGTTTTAT(A) <sub>36</sub>              |
| Clone-7:                                                                                                                                                                   | ATAAATAAAAGATGGCACTTTCCCATTTT(A) <sub>54</sub>                           |
| Clone-10:                                                                                                                                                                  | ATAAATAAAAGATGGCACTTTCCC(A) <sub>45</sub>                                |
| Clone-13:                                                                                                                                                                  | ATAAATAAAAGATGGCACTTT(A) <sub>38</sub>                                   |
| <b>NMuMG:</b>                                                                                                                                                              |                                                                          |
| Clone-5:                                                                                                                                                                   | ATAAATAAAAGATGGCACTTTCC(A) <sub>44</sub>                                 |
| Clone-8:                                                                                                                                                                   | ATAAATAAAAGATGGCACTTTCCCATTTT(A) <sub>67</sub>                           |
| Clone-13:                                                                                                                                                                  | ATAAATAAAAGATGGCACTTTCCCATTTT(A) <sub>63</sub>                           |
| Clone-14:                                                                                                                                                                  | ATAAATAAAAGATGGCACTTTCCCATTTT(A) <sub>67</sub>                           |
| Clone-15:                                                                                                                                                                  | ATAAATAAAAGATGGCACTTTCCC(A) <sub>63</sub>                                |
| Clone-16:                                                                                                                                                                  | ATAAATAAAAGATGGCACTTTCCCATTTTATTCCAGTTTTAT(A) <sub>14</sub>              |
| Clone-17:                                                                                                                                                                  | ATAAATAAAAGATGGCACTTTCCCATTTTATTCCAGTTT<br>TATAAAAAGTGG(A) <sub>42</sub> |
| <b>PAS-3: (1309 and 1444 nt)</b><br><b>Primers:</b> PCR1 Tdo1092, PCR2 Tdo1091 and PCR1:Tdo3162,<br>PCR2:Tdo3163/Tdo3164<br><b>No PCR amplification in both cell lines</b> |                                                                          |
| <b>PAS-4: (1925 nt)</b><br><b>Primers:</b> PCR1: Tdo946, PCR2: Tdo2296                                                                                                     |                                                                          |
| <b>NIH3T3:</b>                                                                                                                                                             |                                                                          |
| Clone-5:                                                                                                                                                                   | TCAACCAATAAAGTTTTTAAAATTGTAAC(A) <sub>13</sub>                           |
| Clone-6:                                                                                                                                                                   | TCAACCAATAAAGTTTTTAAAATTGT(A) <sub>15</sub>                              |
| Clone-9:                                                                                                                                                                   | TCAACCAATAAAGTTTTTAAAATTGT(A) <sub>15</sub>                              |
| Clone-10:                                                                                                                                                                  | TCAACCAATAAAGTTTTTAAAATTGT(A) <sub>14</sub>                              |
| <b>NMuMG:</b>                                                                                                                                                              |                                                                          |
| Clone-4:                                                                                                                                                                   | TCAACCAATAAAGTTTTTAAAATTGT(A) <sub>16</sub>                              |
| Clone-5:                                                                                                                                                                   | TCAACCAATAAAGTTTTTAAAATTGT(A) <sub>19</sub>                              |
| Clone-9:                                                                                                                                                                   | TCAACCAATAAAGTTTTTAAAATTGTAAC(A) <sub>16</sub>                           |

|                                                                           |                                                                   |
|---------------------------------------------------------------------------|-------------------------------------------------------------------|
| Clone-10:                                                                 | TCAACCAATAAAGTTTTTAAAATTGT(A) <sub>14</sub>                       |
| <b>PAS-5 (3255, 3276, 3312 and 3351 nt)</b>                               |                                                                   |
| <b>Primers:</b> PCR1: Tdo3108, PCR2: Tdo3110                              |                                                                   |
| <b>NIH3T3:</b>                                                            |                                                                   |
| <b>Site 5-1: polyadenylation signal at 3255 in UTR 1/10</b>               |                                                                   |
| Clone-4 :                                                                 | GTGTTATAAACTCCACTT(A) <sub>23</sub>                               |
| <b>Site 5-2: polyadenylation signal at 3275 in UTR 8/10</b>               |                                                                   |
| Clone-1:                                                                  | AACTGATTAAGTCTCATTCTTGTC(A) <sub>15</sub>                         |
| Clone-5:                                                                  | AACTGATTAAGTCTCATTCTTGTCATTGTGTGGGTGTTTT<br>ATTA(A) <sub>14</sub> |
| Clone-6:                                                                  | AACTGATTAAGTCTCATTCTTGTC(A) <sub>15</sub>                         |
| Clone-7:                                                                  | AACTGATTAAGTCTCATTCTTGTC(A) <sub>12</sub>                         |
| Clone-8:                                                                  | AACTGATTAAGTCTCATTCTTGTC(A) <sub>13</sub>                         |
| Clone-9:                                                                  | AACTGATTAAGTCTCATTCTTGTC(A) <sub>26</sub>                         |
| Clone-10:                                                                 | AACTGATTAAGTCTCATTCTTGTC(A) <sub>23</sub>                         |
| Clone-12:                                                                 | AACTGATTAAGTCTCATTCTTGTC(A) <sub>19</sub>                         |
| <b>Site 5-3: polyadenylation signal at 3302 in UTR 0/10</b>               |                                                                   |
| <b>Site 5-4: polyadenylation signal at 3351 in UTR 1/10</b>               |                                                                   |
| Clone-11 :                                                                | ATCCATTAATGTTTCAGTAATGGGCAGCCACAT(A) <sub>58</sub>                |
| <b>NMuMG:</b>                                                             |                                                                   |
| <b>Site 5-1: polyadenylation signal at 3255 in UTR 0/12</b>               |                                                                   |
| <b>Site 5-2: polyadenylation signal at 3275 in UTR 12/12</b>              |                                                                   |
| Clone-1:                                                                  | AACTGATTAAGTCTCATTCTTGTC(A) <sub>43</sub>                         |
| Clone-2:                                                                  | AACTGATTAAGTCTCATTCTTGTC(A) <sub>11</sub>                         |
| Clone-3:                                                                  | AACTGATTAAGTCTCATTCTTGTC(A) <sub>34</sub>                         |
| Clone-4:                                                                  | AACTGATTAAGTCTCATTCTTGTC(A) <sub>17</sub>                         |
| Clone-5:                                                                  | AACTGATTAAGTCTCATTCTTGTC(A) <sub>20</sub>                         |
| Clone-6:                                                                  | AACTGATTAAGTCTCATTCTTGTC(A) <sub>19</sub>                         |
| Clone-7:                                                                  | AACTGATTAAGTCTCATTCTTGTC(A) <sub>11</sub>                         |
| Clone-8:                                                                  | AACTGATTAAGTCTCATTCTTGTC(A) <sub>19</sub>                         |
| Clone-9:                                                                  | AACTGATTAAGTCTCATTCTTGTC(A) <sub>17</sub>                         |
| Clone-10:                                                                 | AACTGATTAAGTCTCATTCTTGTC(A) <sub>36</sub>                         |
| Clone-11:                                                                 | AACTGATTAAGTCTCATTCTTGTC(A) <sub>22</sub>                         |
| Clone-12:                                                                 | AACTGATTAAGTCTCATTCTTGTC(A) <sub>40</sub>                         |
| <b>Site 5-3: polyadenylation signal at 3302 in UTR 0/12</b>               |                                                                   |
| <b>Site 5-4: polyadenylation signal at 3351 in UTR 0/12</b>               |                                                                   |
| <b>PAS-6 (5435, 5478, 5582, 5710, 5876, 5913, 6001 and 6109 nt)</b>       |                                                                   |
| <b>Primers:</b> PCR1 Tdo3354, PCR2 Tdo3355 and PCR1 Tdo3356, PCR2 Tdo3357 |                                                                   |
| <b>NMuMG:</b>                                                             |                                                                   |
| <b>Site 6-1 polyadenylation signal at 5435 in UTR 5/5</b>                 |                                                                   |
| Clone-1:                                                                  | TTTAAATAAAGCTGCATATTTTTAAATG(A) <sub>18</sub>                     |
| Clone-3:                                                                  | TTTAAATAAAGCTGCATATTTTTAAATG(A) <sub>24</sub>                     |
| Clone-4:                                                                  | TTTAAATAAAGCTGCATATTTTT(A) <sub>24</sub>                          |
| Clone-5:                                                                  | TTTAAATAAAGCTGCATATTTTTAAATG(A) <sub>15</sub>                     |

|                                                           |                                                         |
|-----------------------------------------------------------|---------------------------------------------------------|
| Clone-7:                                                  | TTTAA <u>ATAAA</u> GCTGCATATTTTTAAATG(A) <sub>35</sub>  |
| <b>Site 6-2 polyadenylation signal at 5478 in UTR 0/5</b> |                                                         |
| <b>Site 6-3 polyadenylation signal at 5582 in UTR 0/5</b> |                                                         |
| <b>Site 6-4 polyadenylation signal at 5710 in UTR 0/5</b> |                                                         |
| <b>Site 6-5 polyadenylation signal at 5876 in UTR 0/7</b> |                                                         |
| <b>Site 6-6 polyadenylation signal at 5913 in UTR 0/7</b> |                                                         |
| <b>Site 6-7 polyadenylation signal at 6001 in UTR 0/7</b> |                                                         |
| <b>Site 6-8 polyadenylation signal at 6109 in UTR 7/7</b> |                                                         |
| Clone-2:                                                  | AAACA <u>ATTA</u> AAAAGGTTTCATTATTTTTG(A) <sub>18</sub> |
| Clone-3:                                                  | AAACA <u>ATTA</u> AAAAGGTTTCATTATTTTTG(A) <sub>32</sub> |
| Clone-4:                                                  | AAACA <u>ATTA</u> AAAAGGTTTCATTATTTTTG(A) <sub>13</sub> |
| Clone-5:                                                  | AAACA <u>ATTA</u> AAAAGGTTTCATTATTTTTG(A) <sub>18</sub> |
| Clone-8:                                                  | AAACA <u>ATTA</u> AAAAGGTTTCATTATTTTTG(A) <sub>26</sub> |
| Clone-12:                                                 | AAACA <u>ATTA</u> AAAAGGTTTCATTATTTTTG(A) <sub>13</sub> |
| Clone-15:                                                 | AAACA <u>ATTA</u> AAAAGGTTTCATTATTTTTG(A) <sub>19</sub> |

## Supplementary Table S2:

Summary of 3'RACE sequencing data in human cell lines

|                                                                                                      |                                                                                |
|------------------------------------------------------------------------------------------------------|--------------------------------------------------------------------------------|
| <b>PAS-1 (46 nt)</b><br>Primers: PCR1 Tdo909, PCR2 Tdo911<br>No PCR amplification in both cell lines |                                                                                |
| <b>PAS-2 (265, and 297 nt)</b><br>Primers: PCR1: Tdo909, PCR2: Tdo2199                               |                                                                                |
| <b>22RV1:</b>                                                                                        |                                                                                |
| <b>Site 2-1: polyadenylation signal at 265 in UTR 4/6</b>                                            |                                                                                |
| Clone-1:                                                                                             | GATTAATAAAGATGGCACTTTCCCGTTTTATTCCAGTT<br>TTAT(A) <sub>31</sub>                |
| Clone-4:                                                                                             | GATTAATAAAGATGGCACTTTCCCGTTTT(A) <sub>45</sub>                                 |
| Clone-6:                                                                                             | GATTAATAAAGATGGCACTTTCCCGTTTT(A) <sub>40</sub>                                 |
| Clone-11:                                                                                            | GATTAATAAAGATGGCACTTTCCCGTTTTATTCCAGTT<br>TTAT(A) <sub>16</sub>                |
| <b>Site 2-2: polyadenylation signal at 265 in UTR 2/6</b>                                            |                                                                                |
| Clone-3:                                                                                             | GATTAATAAAGATGGCACTTTCCCGTTTTATTCCAGTTT<br>TATAAAAAGTGGAAACAG(A) <sub>39</sub> |
| Clone-5:                                                                                             | GATTAATAAAGATGGCACTTTCCCGTTTTATTCCAGTTT<br>TATAAAAAGTGGAGACAG(A) <sub>25</sub> |
| <b>T47D:</b>                                                                                         |                                                                                |
| <b>Site 2-1: polyadenylation signal at 265 in UTR 8/8</b>                                            |                                                                                |
| Clone-3:                                                                                             | GATTAATAAAGATGGCACTTTCCCGTTTT(A) <sub>35</sub>                                 |
| Clone-4:                                                                                             | GATTAATAAAGATGGCACTTTCCCGTTTT(A) <sub>32</sub>                                 |
| Clone-5:                                                                                             | GATTAATAAAGATGGCACTTTCCCGTTTTATTCCAGTTTT(A) <sub>35</sub>                      |
| Clone-6:                                                                                             | GATTAATAAAGATGGCACTTTCCCGTTTTATTCCAGTTT<br>TATAAA(A) <sub>18</sub>             |
| Clone-7:                                                                                             | GATTAATAAAGATGGCACTTTCCCGTTTTATTCCAGTTT<br>TATAAA(A) <sub>15</sub>             |
| Clone-8:                                                                                             | AAAAGGACATTTAAAATTCAATTAGGATTAATAAA(A) <sub>16</sub>                           |
| Clone-9:                                                                                             | GATTAATAAAGATGGCACTTTCCCGTTTT(A) <sub>32</sub>                                 |
| Clone-11:                                                                                            | GATTAATAAAGATGGCACTTTCCCGTTTTATTCCAGTTT<br>TATAAA(A) <sub>17</sub>             |
| Clone-12:                                                                                            | GATTAATAAAGATGGCACTTTCCCGTTTTATTCCAGTTT<br>TATAAA(A) <sub>32</sub>             |
| <b>Site 2-2: polyadenylation signal at 265 in UTR 0/8</b>                                            |                                                                                |
| <b>PAS-3 (880 nt)</b><br>Primers: PCR1: Tdo2199, PCR2: Tdo1141                                       |                                                                                |
| <b>22RV1:</b>                                                                                        |                                                                                |

|                                                                                                                        |                                                                              |
|------------------------------------------------------------------------------------------------------------------------|------------------------------------------------------------------------------|
| Clone-1:                                                                                                               | ATTT <u>ATTAAA</u> TATGTTTTTCTCAATTGT(A) <sub>36</sub>                       |
| Clone-2:                                                                                                               | ATTT <u>ATTAAA</u> TATGTTTTCTCAATTGTAACG(A) <sub>35</sub>                    |
| Clone-3:                                                                                                               | ATTT <u>ATTAAA</u> TATGTTTTCTCAATTGTAACG(A) <sub>30</sub>                    |
| Clone-4:                                                                                                               | ATTT <u>ATTAAA</u> TATGTTTTCTCAATTGT(A) <sub>16</sub>                        |
| Clone-5:                                                                                                               | ATTT <u>ATTAAA</u> TATGTTTTCTCAATTGT(A) <sub>22</sub>                        |
| Clone-6:                                                                                                               | ATTT <u>ATTAAA</u> TATGTTTTCTCAATTGT(A) <sub>13</sub>                        |
| Clone-7:                                                                                                               | ATTT <u>ATTAAA</u> TATGTTTTCTCAATTGT(A) <sub>17</sub>                        |
| Clone-9:                                                                                                               | ATTT <u>ATTAAA</u> TATGTTTTCTCAATTGT(A) <sub>13</sub>                        |
| Clone-10:                                                                                                              | ATTT <u>ATTAAA</u> TATGTTTTCTCAATTGT(A) <sub>35</sub>                        |
| <b>T47D:</b>                                                                                                           |                                                                              |
| Clone-1:                                                                                                               | ATTT <u>ATTAAA</u> TATGTTTTCTCAATTGT(A) <sub>28</sub>                        |
| Clone-2:                                                                                                               | ATTT <u>ATTAAA</u> TATGTTTTCTC(A) <sub>17</sub>                              |
| Clone-3:                                                                                                               | ATTT <u>ATTAAA</u> TATGTTTTCTCAATTGT(A) <sub>30</sub>                        |
| Clone-4:                                                                                                               | ATTT <u>ATTAAA</u> TATGTTTTCTCAATTGT(A) <sub>31</sub>                        |
| Clone-5:                                                                                                               | ATTT <u>ATTAAA</u> TATGTTTTCTCAATTGT(A) <sub>14</sub>                        |
| Clone-6:                                                                                                               | ATTT <u>ATTAAA</u> TATGTTTTCTCAATTGT(A) <sub>17</sub>                        |
| Clone-7:                                                                                                               | ATTT <u>ATTAAA</u> TATGTTTTCTC(A) <sub>22</sub>                              |
| Clone-8:                                                                                                               | ATTT <u>ATTAAA</u> TATGTTTTCTCAATTGT(A) <sub>28</sub>                        |
| Clone-10:                                                                                                              | ATTT <u>ATTAAA</u> TATGTTTTCTCAATTGT(A) <sub>14</sub>                        |
| Clone-11:                                                                                                              | ATTT <u>ATTAAA</u> TATGTTTTCTCAATTGT(A) <sub>21</sub>                        |
| Clone-12:                                                                                                              | ATTT <u>ATTAAA</u> TATGTTTTCTCAATTGT(A) <sub>34</sub>                        |
| <b>PAS-4 (1060 nt)</b><br>Primers: PCR1: Tdo2199, PCR2: Tdo1141                                                        |                                                                              |
| <b>22RV1:</b>                                                                                                          |                                                                              |
| Clone-11 :                                                                                                             | TTCTC <u>ATTAAA</u> TATAAAATATTTTGTAATGCTGCACAGAAA<br>TTTTC(A) <sub>21</sub> |
| <b>T47D:</b><br><b>Not detected</b>                                                                                    |                                                                              |
| <b>PAS-5 (1292 nt)</b><br>Primers: PCR1: Tdo2201, PCR2: Tdo826<br><b>No PCR amplification in both cell lines</b>       |                                                                              |
| <b>PAS-6 (1622 nt)</b><br>Primers: PCR1: Tdo1142, PCR2: Tdo2209<br><b>No PCR amplification in both cell lines</b>      |                                                                              |
| <b>PAS-7 (2178, 2226 nt)</b><br>Primers: PCR1: Tdo828, PCR2: Tdo1147<br><b>No PCR amplification in both cell lines</b> |                                                                              |
| <b>PAS-8 (3262, 3283 and 3319 nt)</b><br>Primers: PCR1: Tdo3104, PCR2: Tdo3106                                         |                                                                              |
| <b>22RV1:</b>                                                                                                          |                                                                              |



|                                                             |                                                                                   |
|-------------------------------------------------------------|-----------------------------------------------------------------------------------|
| <b>Site 8-1: polyadenylation signal at 3262 in UTR 3/11</b> |                                                                                   |
| Clone-3:                                                    | TAGTGTTATAAACTCCACTTAAAAGTCTC(A) <sub>24</sub>                                    |
| Clone-5:                                                    | TAGTGTTATAAACTCCACTTAAAAGT(A) <sub>11</sub>                                       |
| Clone-12:                                                   | TAGTGTTATAAACTCCACTTAAAAGT(A) <sub>14</sub>                                       |
| <b>Site 8-2: polyadenylation signal at 3283 in UTR 8/11</b> |                                                                                   |
| Clone-2:                                                    | CTGATTAAGTCTCATTCTTGTC(A) <sub>17</sub>                                           |
| Clone-4:                                                    | CTGATTAAGTCTCATTCTTGTC(A) <sub>16</sub>                                           |
| Clone-7:                                                    | CTGATTAAGTCTCATTCTTGTC(A) <sub>18</sub>                                           |
| Clone-9:                                                    | CTGATTAAGTCTCATTCTTGTC(A) <sub>17</sub>                                           |
| Clone-10:                                                   | ACTGATTAAGTCTCATTCTTGTC(A) <sub>41</sub>                                          |
| Clone-13:                                                   | CTGATTAAGTCTCATTCTTGTC(A) <sub>18</sub>                                           |
| Clone-16:                                                   | CTGATTAAGTCTCATTCTTGTC(A) <sub>19</sub>                                           |
| Clone-17:                                                   | CTGATTAAGTCTCATTCTTGTC(A) <sub>12</sub>                                           |
| <b>Site 8-3: polyadenylation signal at 3319 in UTR 0/11</b> |                                                                                   |
| <b>T47D:</b>                                                |                                                                                   |
| <b>Site 8-1: polyadenylation signal at 3262 in UTR 5/10</b> |                                                                                   |
| Clone-4:                                                    | GTGTTATAAACTCCACTTAAAAGT(A) <sub>20</sub>                                         |
| Clone-10:                                                   | GTGTTATAAACTCCACTTAAAAGT(A) <sub>17</sub>                                         |
| Clone-12:                                                   | GTGTTATAAACTCCACTTAAAAGT(A) <sub>13</sub>                                         |
| Clone-16:                                                   | GTGTTATAAACTCCACTTAAAAGT(A) <sub>17</sub>                                         |
| <b>Site 8-2: polyadenylation signal at 3283 in UTR 4/10</b> |                                                                                   |
| Clone-2:                                                    | CTGATTAAGTCTCATTCTTGTC(A) <sub>12</sub>                                           |
| Clone-14:                                                   | CTGATTAAGTCTCATTCTTGTC(A) <sub>13</sub>                                           |
| Clone-15:                                                   | CTGATTAAGTCTCATTCTTGTC(A) <sub>14</sub>                                           |
| Clone-18:                                                   | CTGATTAAGTCTCATTCTTGTC(A) <sub>21</sub>                                           |
| <b>Site 8-3: polyadenylation signal at 3319 in UTR 1/10</b> |                                                                                   |
| Clone-13:                                                   | CTGATTAAGTCTCATTCTTGTCATTGTGTGGGTGTTTTATTAA<br>ATGAGAGTTTATAATTC(A) <sub>16</sub> |

**Supplementary Table S3:**

List of primers used for PTEN 3'RACE (mouse)

| <b>Primer</b> | <b>Sequence 5'-3'</b>          | <b>Information</b>                     |
|---------------|--------------------------------|----------------------------------------|
| Tdo679        | GCGAGCTCCGCGGCCGCGTTTTTTTTTTTT | oligo dT anchor used for all RT        |
| Tdo680        | GCGAGCTCCGCGGCCGCG             | Reverse primer used for all 3'RACE PCR |
| Tdo886        | GCGTGCAGATAATGACAAGG           | PAS-1 PCR1<br>PAS-2 PCR1               |
| Tdo910        | GAGGAGCCATCAAATCCAGA           | PAS-1 PCR2                             |
| Tdo2187       | CCACAGGGTTTTGACACTTG           | PAS-2 PCR2                             |
| Tdo1092       | TCCTACCCCTTTGCACTTGT           | PAS-3 PCR1-1                           |
| Tdo1091       | GGCTGCCAGTTTGTTTTCT            | PAS-3 PCR2-1                           |
| Tdo3162       | TCTCAGTTGTAATGACTGCTCC         | PAS-3 PCR1-2                           |
| Tdo3163       | ACCTACTGTGGATGCTTCATGTG        | PAS-3 PCR2-2                           |
| Tdo3164       | CTTGAGATTCAACAGTAAGCAGG        | PAS-3 PCR2-3                           |
| Tdo946        | CAGCACTGCACGAATAATAAGG         | PAS-4 PCR1                             |
| Tdo2296       | GGGAATTTGGTGTCTTTCAA           | PAS-4 PCR2                             |
| Tdo3108       | TATGACAGTATTCACGATTAGCC        | PAS-5 PCR1                             |
| Tdo3110       | TCATAACGATGGCTGTGGTTG          | PAS-5 PCR2                             |
| Tdo3354       | TGCTCAGCAAATGCGTACCTACC        | PAS-6 PCR1                             |
| Tdo3355       | GCTCTGAATGTTGAGTATTCTGG        | PAS-6 PCR2                             |
| Tdo3356       | GAATGGAGCAAGGCTTGTAGTGG        | PAS-6 PCR1-2                           |
| Tdo3357       | CTATTGAGTTTGAAGTGTGCAC         | PAS-6 PCR2-2                           |

**Supplementary Table S4:**List of primers used for *PTEN* 3'RACE (human)

| <b>Primer</b> | <b>Sequence 5'-3'</b>          | <b>Information</b>                     |
|---------------|--------------------------------|----------------------------------------|
| Tdo679        | GCGAGCTCCGCGGCCGCGTTTTTTTTTTTT | oligo dT anchor used for all RT        |
| Tdo680        | GCGAGCTCCGCGGCCGCG             | Reverse primer used for all 3'RACE PCR |
| Tdo909        | TAGAGGAGCCGTCAAATCCA           | PAS-1 PCR1<br>PAS-2 PCR1               |
| Tdo911        | CTGACACCACTGACTCTGATCC         | PAS-1 PCR2<br>PAS-2 PCR1               |
| Tdo2199       | TGGCAATAGGACATTGTGTCA          | PAS-2 PCR2<br>PAS-3 PCR1               |
| Tdo1141       | TTCACATCCTACCCCTTTGC           | PAS-3 PCR2<br>PAS-4 PCR1               |
| Tdo2200       | TCAACAAAGAATGGGCTTGA           | PAS-4 PCR2                             |
| Tdo2201       | TCCATCTCCTGTGTAATCAAGG         | PAS-5 PCR1                             |
| Tdo826        | CTGTGGATGCTTCATGTGCT           | PAS-5 PCR2                             |
| Tdo1142       | ATAGCTGTCAGCCGTTCCAC           | PAS-6 PCR1<br>PAS-7 PCR2               |
| Tdo2209       | TTGATTTGCTATTGAAAGAATAGGG      | PAS-6 PCR2                             |
| Tdo828        | TTGGTGCTGAAATTGTTCACT          | PAS-7 PCR1                             |
| Tdo3104       | GGCAGTATTCATAATTAGCCTG         | PAS-8 PCR1                             |
| Tdo3106       | CCACAAAGTGCCTCGTTTACC          | PAS-8 PCR2                             |

## Supplementary Table S5

APA sites identified from GenXPro RNAseq databases

### Human PTEN

position: Chr10, 89623195~89728532, CDS ends at 89725229

*ALL* (Acute Lymphoblastic Lymphoma)

<http://tools.genxpro.net/apadb/browse/human/all/PTEN/>

| Sites | Position in 3'UTR (from GenXPro) | Position in Chr10 | Reads |
|-------|----------------------------------|-------------------|-------|
| 1     | 46                               | 89725275          | 15    |
| 2     | 286                              | 89725515          | 6     |
| 3     | 883                              | 89726112          | 11    |
| 8     | 3282                             | 89728511          | 5     |

*HLF* (Human Lung Fibroblasts)

<http://tools.genxpro.net/apadb/browse/human/hlf/PTEN/?sort=location>

| Sites | Position in 3'UTR (from GenXPro) | Position in Chr10 | Reads |
|-------|----------------------------------|-------------------|-------|
| 1     | 49                               | 89725278          | 288   |
| 2     | 282                              | 89725511          | 59    |
| 3     | 902                              | 89726131          | 38    |
| 6     | 1642                             | 89726871          | 5     |
| 8     | 3275                             | 89728504          | 62    |

### Mouse Pten

position: Chr19, 32757577~32826160, CDS ends at 32820028

*Muscle*

<http://tools.genxpro.net/apadb/browse/mouse/muscle/Pten/>

| Sites | Position in 3'UTR (from GenXPro) | Position in Chr19 | Reads |
|-------|----------------------------------|-------------------|-------|
| 1     | 61                               | 32820089          | 16    |
| 2     | 297                              | 32820325          | 21    |
| 5     | 3299                             | 32823327          | 9     |
| 6-1   | 5432                             | 32825460          | 32    |
| new   | 5637                             | 32825701          | 7     |
| 6-8   | 6127                             | 32826155          | 50    |

*Brain*

<http://tools.genxpro.net/apadb/browse/mouse/brain/Pten/>

| Sites | Position in 3'UTR (from GenXPro) | Position in Chr19 | Reads |
|-------|----------------------------------|-------------------|-------|
| 5     | 3300                             | 32823328          | 15    |
| 6-1   | 5433                             | 32825461          | 39    |
| new   | 5674                             | 32825702          | 8     |
| new   | 6008                             | 32826036          | 8     |
| 6-8   | 6131                             | 32826159          | 19    |

### Supplementary Table S6:

List of primers used for gene quantification

| Primer and gene name                      | Sequence (5'-3')        | Type of PCR |
|-------------------------------------------|-------------------------|-------------|
| <b><i>Pten</i> 300 3'UTR isoform</b>      |                         |             |
| Tdo886                                    | GCGTGCAGATAATGACAAGG    | PCR1        |
| Tdo680                                    | GCGAGCTCCGCGGCCGCG      |             |
| Tdo2197                                   | TGGCAATAGGACATTGTGTCA   | qPCR2       |
| Tdo3734                                   | CAAGTGTCAAACCCTGTGG     |             |
| <b><i>Pten</i> 3.3 3'UTR isoform</b>      |                         |             |
| Tdo3108                                   | TATGACAGTATTCACGATTAGCC | PCR1        |
| Tdo680                                    | GCGAGCTCCGCGGCCGCG      |             |
| Tdo3764                                   | ACCTGCCAGCTCAAAGTTC     | qPCR2       |
| Tdo3765                                   | TGCTGCACAGCACAAAGAGTA   |             |
| <b><i>Pten</i> 5.5/6.0 3'UTR isoforms</b> |                         |             |
| Tdo3768                                   | TGCTGCACAGCACAAAGAGTA   | qPCR        |
| Tdo3769                                   | ACAAGTCACAGAAGCACACA    |             |
| <b><i>Hprt</i></b>                        |                         |             |
| Tdo1610                                   | ACAAGTCACAGAAGCACACA    | qPCR        |
| Tdo1611                                   | AAGCTTGCTGGTGAAAAGGA    |             |
| <b><i>Pten</i> long 3'UTR isoforms</b>    |                         |             |
| Tdo3130                                   | TTGCGCTCATCTTAGGCTTT    | qPCR        |
| Tdo3131                                   | TGCTGCCGGTAAACTCCACT    |             |
| <b><i>Pten</i> total</b>                  |                         |             |
| Tdo886                                    | GCGTGCAGATAATGACAAGG    | qPCR        |
| Tdo887                                    | TCTGGATTTGATGGCTCCTC    |             |
| <b><i>c-myc</i></b>                       |                         |             |
| Tdo1399                                   | AGTGCTGCATGAGGAGACAC    | qPCR        |
| Tdo1400                                   | GGTTTGCCTCTTCTCCACAG    |             |

**Supplementary Table S7:**

Sequence of 3'UTR shRNAs

| <b>shRNA</b> | <b>Sequence 5'-3'</b> |
|--------------|-----------------------|
| sh3          | AATCTGGACATCCGAGAGATT |
| sh6          | AATGGAGGGAATGCTCAGAAA |
| sh7          | AAGAGCATATTGGTGCTAGAC |
| sh8          | AATCCACAAAGGAAGGGATAT |
| sh9          | AACCATACAAATGTGGAGGCT |
| sh10         | AATGACTGCTCCATCTCCTAT |
| sh12         | AATCATATACCTACTGTGGAT |
| sh13         | AATTTACAGCACTGCACGAAT |
| sh15         | AATGGTAATGTGAAGATGCTA |
| sh16         | AAGTACAGATTGCATAGGACC |
| sh17         | AAGTAGATTAGGCAGAACGCC |

**Supplementary Table S8:**

Sequence of primers used to amplify miRNA precursors

| <b>Tdo #</b>       | <b>Sequence 5'-3'</b>        |
|--------------------|------------------------------|
| <b>Mmu-miR-19b</b> |                              |
| Tdo2337            | TTGGATCCCCCAGCCAAGTCTCCTGTTA |
| Tdo2338            | TTGAATTCCTGTGTAGAAAGGGGTTTGA |
| <b>Mmu-miR-26b</b> |                              |
| Tdo1102            | CCGGGACCCAGTTCAAGTA          |
| Tdo1103            | GCCCCGAGCCAAGTAAT            |
